# Supplementary material for: Multi-well fungal co-culture for de novo metabolite-induction in time-series studies based on untargeted metabolomics
Source: Royal Society of Chemistry journal article supplement (doi:10.1039/c4mb00223g), 2014-06-10
Supplement: c4mb00223g1.pdf [file c4mb00223g1.pdf]

Electronic Supplementary Information

***Multi-well fungal co-culture for de novo metabolite-induction in time series studies based on untargeted metabolomics***

Samuel Bertrand,<sup>a,b,1</sup> Antonio Azzollini,<sup>a,1</sup> Olivier Schumpp,<sup>c</sup> Nadine Bohni,<sup>a</sup> Jacques Schrenzel,<sup>d</sup> Michel Monod,<sup>e</sup> Katia Gindro,<sup>c</sup> Jean-Luc Wolfender<sup>a,\*</sup>

<sup>a</sup> School of Pharmaceutical Sciences, EPGL, University of Geneva, University of Lausanne, quai Ernest-Ansermet 30, CH-1211 Geneva 4, Switzerland

<sup>b</sup> Groupe Mer, Molécules, Santé-EA 2160, UFR des Sciences pharmaceutiques et biologiques, Université de Nantes, 9 rue Bias, BP 53508, F-44035 Nantes Cedex 01, France

<sup>c</sup> Mycology and Biotechnology group, Institute for Plant Production Sciences IPS, Agroscope, Route de Duillier 50, P.O. Box 1012, 1260 Nyon, Switzerland

<sup>d</sup> Clinical Microbiology Laboratory, Service of Infectious Diseases, Geneva University Hospital, Rue Gabrielle-Perret-Gentil 4, CH-1211 Geneva 4, Switzerland

<sup>e</sup> Departement of Dermatology and Venereology, Laboratory of Mycology, CHUV, CH-1011 Lausanne, Switzerland

<sup>1</sup> AA and SB contributed equally to this work.

\* Tel: +41 22 379 33 85. Fax: +41 22 379 33 99. E-mail: jean-luc.wolfender@unige.ch.

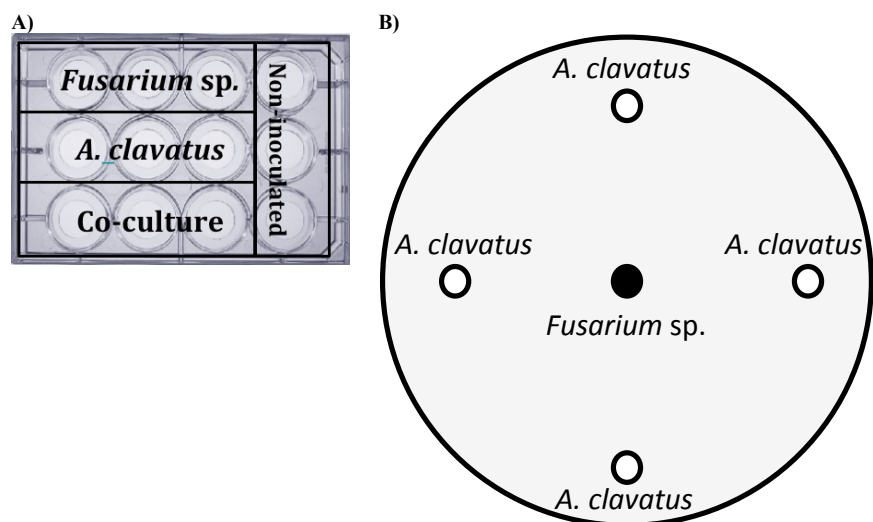

Fig. S1. Organization and inoculation of Petri dishes; A) miniaturized culture; B) large scale culture.

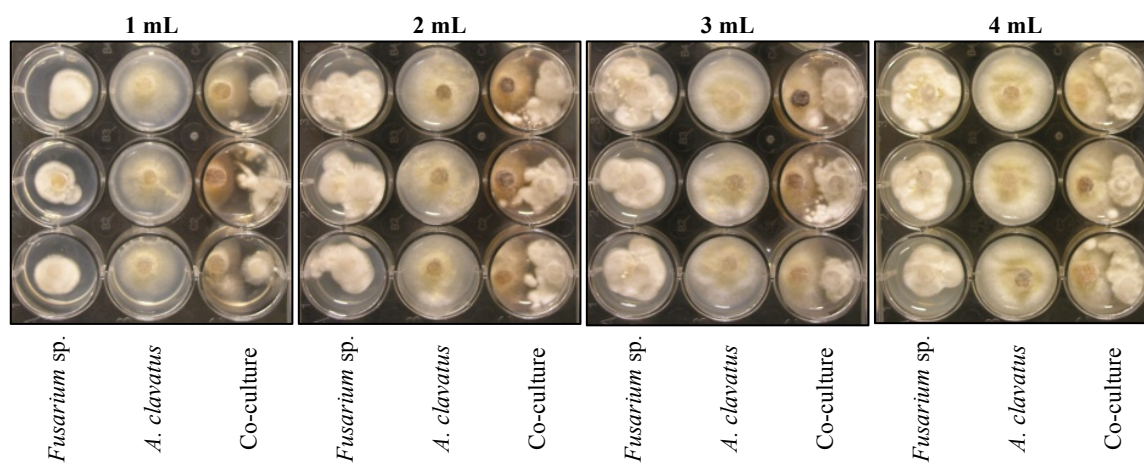

Fig. S2. Pictures of the fungal colony in the 2 cm diameter Petri dish (12-well plates) showing the influence of the culture medium volume on the fungal growth.

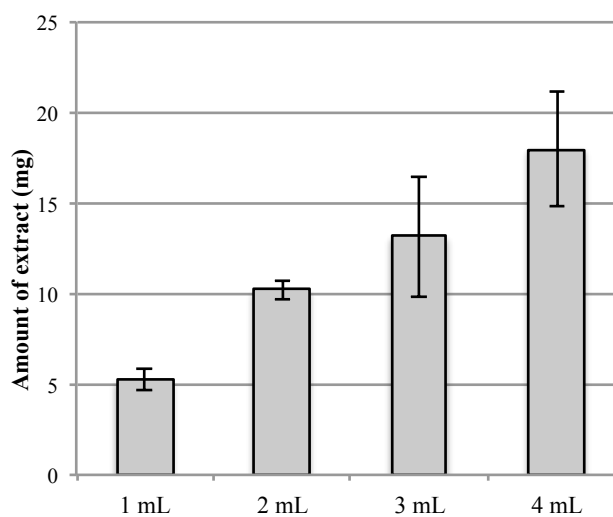

Fig. S3. Amount of fungal co-culture extract obtained depending on the amount of culture medium added to the 2 cm diameter Petri dish (12-well plates).

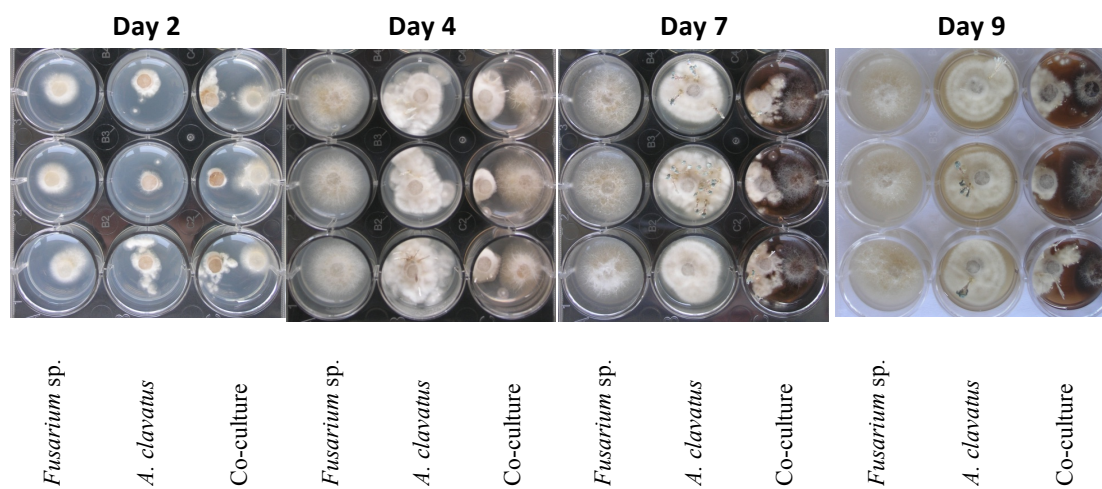

Fig. S4. Morphology of the different colonies at day 2, 4, 7 and 9.

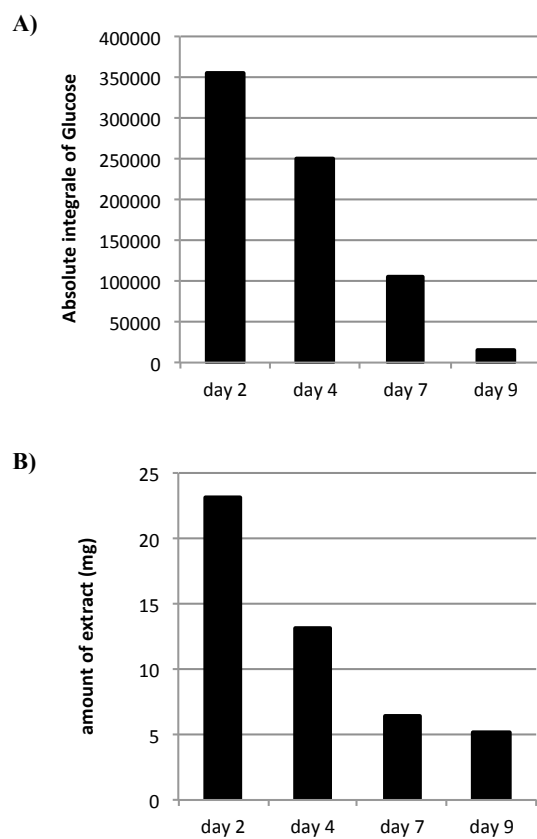

Fig. S5. Evolution of the amount of glucose ( $\alpha + \beta$ ) during the co-culture fungal growth based on  $^1\text{H}$  NMR integration of their anomeric proton ( $\delta_{\text{H}}$  5.2 and 4.5 ppm) (A) in regard to the evolution of the amount of extract obtained (B).

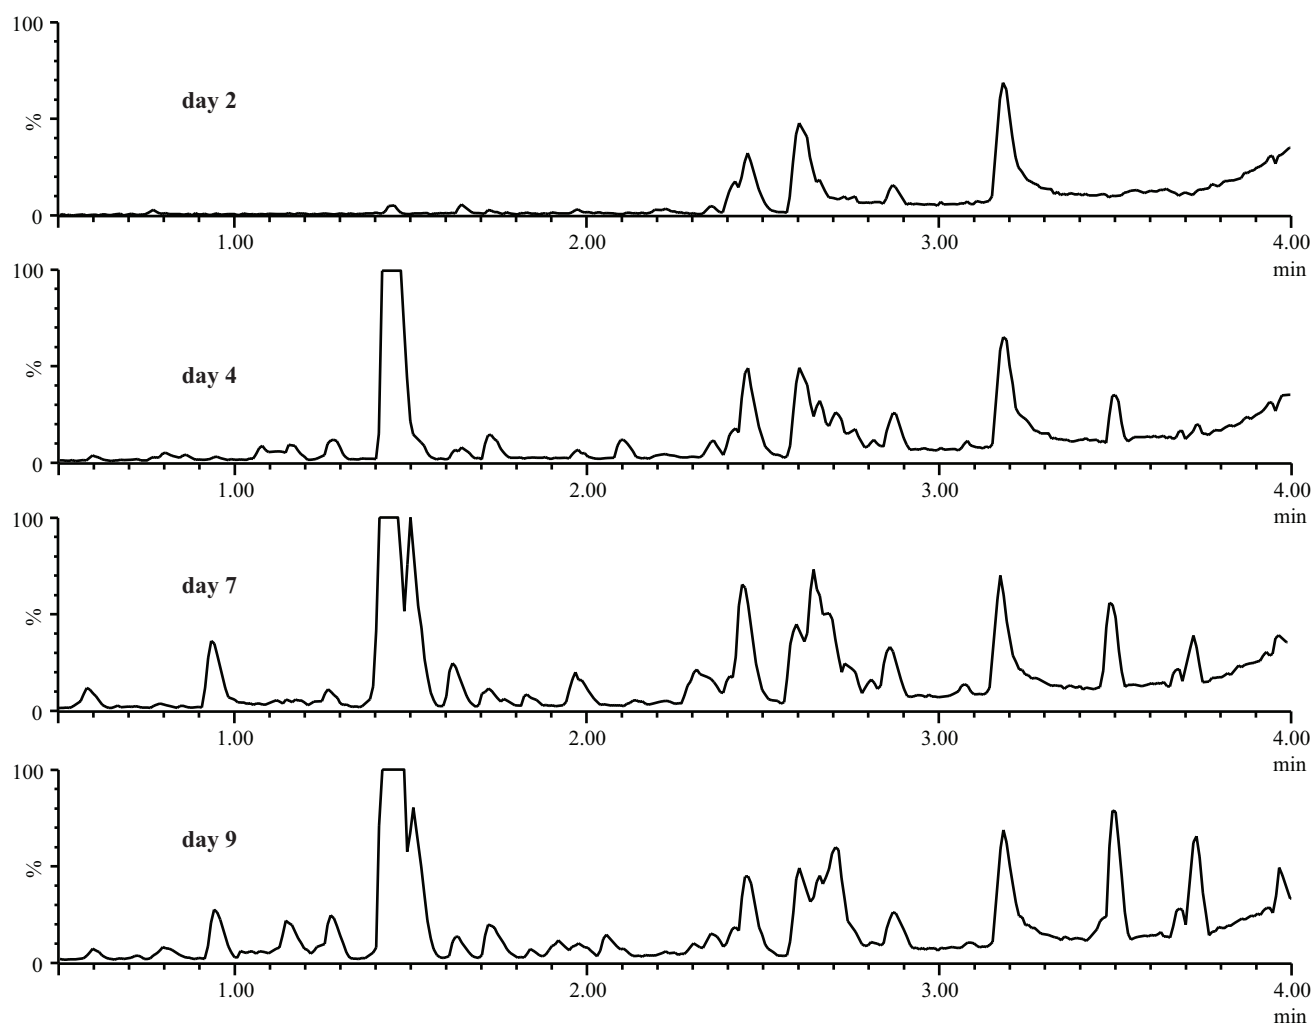

Fig. 6 UHPLC-TOFMS profiles of the co-culture extracts at the four time points analyzed (2, 4, 7 and 9 days).

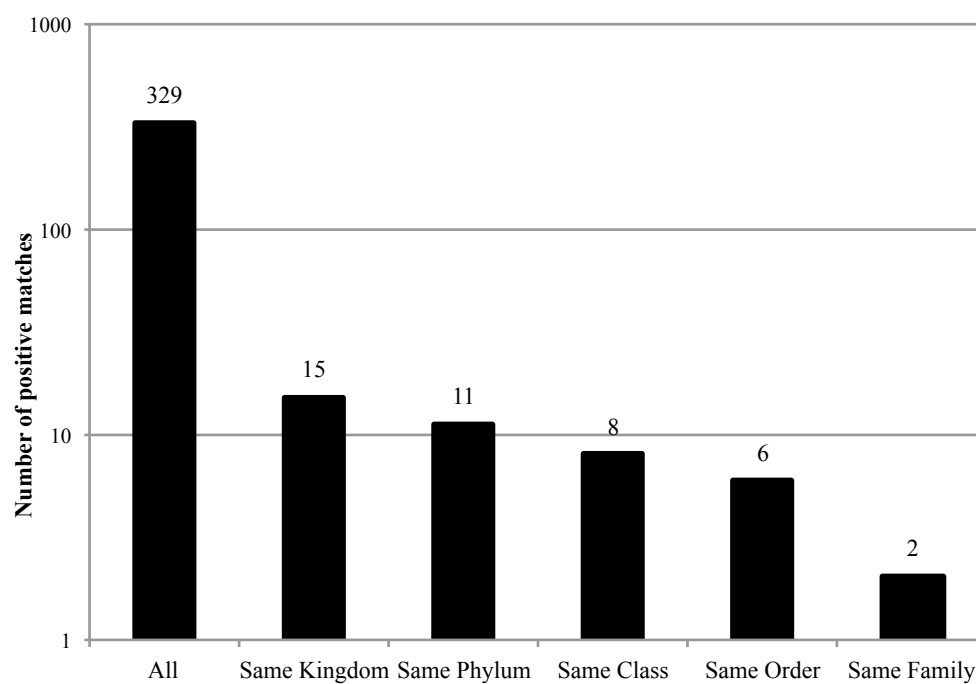

Fig. S7. Number of positive matches (mean values of all the highlighted metabolites in that study) in the Dictionary of Natural Product (*Dictionary of Natural Products on DVD 2012 Vol. 21:2*, CRC Press, Taylor & Francis Group) based on HR-MS data (15 ppm accuracy) and limited to biological source similarities (according to Catalogue of Life, Species2000, <http://www.catalogueoflife.org>).



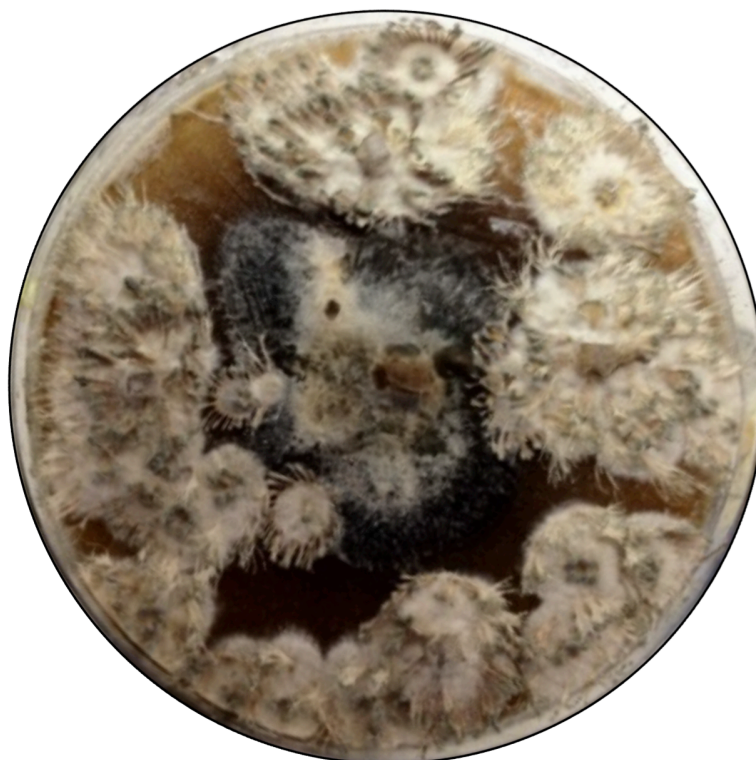

Fig. S8. Large-scale fungal co-culture between *A. clavatus* (on the sides) and *Fusarium* sp. obtained after 24 days of growth in 15 cm Petri dishes.

Table S1. List of the *de novo* induced biomarkers with their putative identification based on Dictionary of Natural Product (*Dictionary of Natural Products on DVD 2012 Vol. 21:2*, CRC Press, Taylor & Francis Group).

| RT (min)                        | m/z (Da) |         | Day of <i>de novo</i> induction | Putative identification based on the Dictionary of Natural Products |
|---------------------------------|----------|---------|---------------------------------|---------------------------------------------------------------------|
|                                 | NI       | PI      |                                 |                                                                     |
| Produced by <i>Fusarium</i> sp. |          |         |                                 |                                                                     |
| 0.60                            | 175.060  |         | 7                               | -                                                                   |
| 1.28                            | 151.039  |         | 9                               | Gibepyrone F <sup>b</sup>                                           |
| 1.46                            |          | 289.069 | 4, 7                            | TM <sup>b</sup>                                                     |
| 1.85                            |          | 286.070 | 7, 9                            | Bostrycoidin <sup>b</sup> [M+H] <sup>+</sup>                        |
| Produced by <i>A. clavatus</i>  |          |         |                                 |                                                                     |
| 0.77                            |          | 194.153 | 9                               | -                                                                   |
| 2.55                            |          | 444.162 | 9                               | Fumiquinazoline C or D <sup>a</sup> [M+H] <sup>+</sup>              |
| 2.69                            | 476.277  |         | 2                               | -                                                                   |
| 3.15                            |          | 585.391 | 7                               | -                                                                   |
| 3.18                            | 588.353  |         | 4                               | -                                                                   |
| Unknown Producer                |          |         |                                 |                                                                     |
| 0.77                            | 387.038  |         | 4                               | TM <sup>a,b</sup>                                                   |
| 0.80                            | 525.071  |         | 9                               | -                                                                   |
| 1.03                            | 445.114  |         | 9                               | -                                                                   |
| 1.15                            | 581.131  |         | 9                               | -                                                                   |
| 1.44                            | 205.087  |         | 7, 9                            | TM <sup>a,b</sup>                                                   |
| 1.44                            |          | 481.032 | 9                               | -                                                                   |
| 1.44                            | 427.103  |         | 7, 9                            | (S)-Mitorubrin <sup>a</sup> [M+HCO <sub>2</sub> ] <sup>-</sup>      |
| 1.46                            | 305.066  |         | 7                               | TM <sup>a,b</sup>                                                   |
| 2.55                            |          | 265.178 | 9                               | Brefeldin A <sup>a</sup> [M+H] <sup>+</sup>                         |

<sup>a</sup>: closely related to *A. clavatus*; <sup>b</sup>: closely related to *Fusarium* sp.; TM: Too many possibilities reported to putatively identify the compound

Table S2. Steps and parameters used during the automatic peak piking procedure by MZmine 2.

| Steps                                                                                 | Parameters                     | Value        |            |
|---------------------------------------------------------------------------------------|--------------------------------|--------------|------------|
|                                                                                       |                                | NI           | PI         |
| <b>1) Raw data methods -&gt; Filtering -&gt; Dataset Filtering</b>                    |                                |              |            |
| Filter                                                                                | Crop filter                    |              |            |
|                                                                                       | Retention time (min)           | 0.4 to 4.5   | 0.4 to 4.5 |
| <b>2) Raw data methods -&gt; Peak detection -&gt; Mass detection</b>                  |                                |              |            |
| Mass detector                                                                         | Centroid                       |              |            |
|                                                                                       | Noise Level                    | 30           | 30         |
|                                                                                       | MS level                       | 1            | 1          |
| <b>3) Raw data methods -&gt; Peak detection -&gt; Chromatogram builder</b>            |                                |              |            |
|                                                                                       | Min time span (min)            | 0.03         | 0.03       |
|                                                                                       | Min height                     | 30           | 30         |
|                                                                                       | <i>m/z</i> tolerance (ppm)     | 5            | 5          |
| <b>4) Peak list methods -&gt; Peak detection -&gt; Chromatogram deconvolution</b>     |                                |              |            |
|                                                                                       | Min peak height                | 30           | 30         |
|                                                                                       | Peak duration range (min)      | 0.03 - 10    | 0.03 - 10  |
|                                                                                       | Baseline level                 | 10           | 10         |
| <b>5) Peak list methods -&gt; Isotopes -&gt; Isotopic peaks grouper</b>               |                                |              |            |
|                                                                                       | <i>m/z</i> tolerance (ppm)     | 5            | 5          |
|                                                                                       | Retention time tolerance (min) | 0.03         | 0.03       |
|                                                                                       | Maximum charge                 | 3            | 3          |
|                                                                                       | Representative isotope         | Most intense |            |
| <b>6) Peak list methods -&gt; Alignment -&gt; Join aligner</b>                        |                                |              |            |
|                                                                                       | <i>m/z</i> tolerance (ppm)     | 15           | 15         |
|                                                                                       | Weight for <i>m/z</i>          | 10           | 10         |
|                                                                                       | Retention time tolerance (min) | 0.2          | 0.2        |
|                                                                                       | Weight for RT                  | 10           | 10         |
| <b>7) Removal of the peaks from blanks and Agar samples from the generated matrix</b> |                                |              |            |
| <b>8) Peak List methods -&gt; Gap filling -&gt; Peak finder</b>                       |                                |              |            |
|                                                                                       | Intensity tolerance (%)        | 100          | 100        |
|                                                                                       | <i>m/z</i> tolerance (ppm)     | 15           | 15         |
|                                                                                       | Retention time tolerance (min) | 0.2          | 0.2        |
